1 **Prophages regulate *Shewanella fidelis* 3313 motility and biofilm formation:**  
2 **implications for gut colonization dynamics in *Ciona robusta***

3  
4 Ojas Natarajan<sup>1</sup>, Susanne L. Gibboney<sup>1</sup>, Morgan N. Young<sup>1</sup>, Shen Jean Lim<sup>4</sup>, Natalia  
5 Pluta<sup>2\*\*\*</sup>, Celine G.F. Atkinson<sup>3</sup>, Brittany A. Leigh<sup>1,4\*</sup>, Assunta Liberti<sup>1,5</sup>, Eric D. Kees<sup>7\*\*</sup>,  
6 Mya Breitbart<sup>4</sup>, Jeffrey A. Gralnick<sup>6,7</sup>, and Larry J. Dishaw<sup>1,3,4‡</sup>

7  
8 <sup>1</sup>Morsani College of Medicine, Pediatrics, <sup>2</sup>Biomedical Sciences Program, <sup>3</sup>Department  
9 of Cell Biology, Microbiology, and Molecular Biology, <sup>4</sup>College of Marine Science,  
10 University of South Florida, Tampa, FL USA, <sup>5</sup>Stazione Zoologica Anton Dohrn, Naples,  
11 Italy, <sup>6</sup>Plant and Microbial Biology, University of Minnesota, St. Paul, MN USA,

12 <sup>7</sup>BioTechnology Institute, University of Minnesota, St. Paul, MN USA.

13 \* Current address: LifeSci Communications, New York and Boston, USA.

14 \*\* Current address: Cargill Corporation, Wayzata, MN, USA.

15 \*\*\* Current address: Uniformed Services University of Health Sciences, Bethesda, MD,  
16 USA

17 ‡ Corresponding author: ldishaw@usf.edu

18  
19 **Abstract**

20  
21 Lysogens are bacteria that contain viruses (prophages) integrated into their  
22 genomes, and these prophages often affect metabolic pathways and other traits of their  
23 bacterial hosts. Lysogens are abundant in the gut of animals. However, the potential  
24 influence of prophages on the gut microbiota-host immune axis in animals remains  
25 poorly understood. Here, we investigated the role of prophages in a marine lysogen,  
26 *Shewanella fidelis* 3313, a persistent member of the gut microbiome of the model  
27 tunicate, *Ciona robusta*. Deletion mutants were established for two prophages (SfMu1  
28 and SfPat) to determine their impact on bacterial physiology *in vitro* and in the context of  
29 colonizing the *Ciona* gut. This study reveals the influence of prophages on bacterial  
30 traits that shape colonization dynamics. *In vitro*, these two prophages enhance *S. fidelis*  
31 3313 motility and swarming while reducing biofilm formation. To understand the *in vivo*  
32 impact of these prophage-induced changes on bacterial traits, we exposed  
33 metamorphic stage 4 *Ciona* juveniles (the stage that correlates to first feeding and

34 subsequent gut colonization) to both wildtype (WT) and modified strains of *S. fidelis*  
35 3313. During gut colonization, expression of the *pdeB* gene is upregulated in the WT  
36 strain but not the deletion mutants. PdeB is a phosphodiesterase that degrades cyclic-  
37 di-GMP, a dinucleotide messenger, which influences biofilm formation and motility.  
38 Colonization by the WT strain and increased expression of *pdeB* also correlate to the  
39 reduced expression of the *Ciona* gut immune effector, VCBP-C. Differential localization  
40 of the prophage deletion mutant strain to the stomach epithelium and the WT to the  
41 esophagus was observed upon colonization of the juveniles. Our findings highlight the  
42 importance of investigating inter-kingdom interactions between prophages, bacteria,  
43 and their animal hosts in regulating the gut microbiota-host immune axis.

44

## 45 **Importance**

46 The gut microbiome is now recognized to have important influences on host  
47 physiology. These host-associated microbial communities are often predominated by  
48 bacteria that carry prophages, which are bacteriophages (or phages) that stably  
49 integrate into bacterial genomes. While it is recognized that prophages can influence  
50 bacterial physiology, their impact on inter-kingdom dynamics in the gut of animals  
51 remains poorly understood. Here, we show that prophages contribute to increased  
52 motility and reduced biofilm formation in *Shewanella fidelis* 3313, a marine bacterium  
53 that colonizes the *Ciona robusta* gut. Prophages were also found to be associated with  
54 changes in the regulation of a bacterial secondary signaling molecule, cyclic di-GMP,  
55 and corresponded with variations in *Ciona* innate immune responses. Our work

56 highlights potential tripartite links between prophages, their bacterial hosts, and animal  
57 immune functions.

58  
59 **Introduction**

60 The gastrointestinal tract (or gut) of animals is lined by an epithelial layer with a  
61 mucus-rich surface. This dynamic environment is a primary interface between host  
62 immunity, symbiotic microbes, and dietary antigens [1, 2]. In the process of colonizing  
63 the gut, bacteria encounter physical, chemical, and biological forces. They must  
64 compete for nutrients and niche space while managing the stress of digestive enzymes  
65 and host immune factors [3-6]. Gut-colonizing bacteria also encounter bacteriophages  
66 (phages), or viruses that infect bacteria [7]; e.g., over  $10^{12}$  viruses have been estimated  
67 in the human gut [8].

68 Phages exhibit both lytic and temperate lifestyles. While the former is known to  
69 impact bacterial community dynamics through lysis, the impact of temperate phages on  
70 bacterial communities, particularly those that associate with animals, remains poorly  
71 understood. Conventionally, temperate phages integrate into bacterial genomes as  
72 prophages and remain 'dormant' until an external trigger activates them to enter the lytic  
73 cycle [9-11]; these bacteria are considered 'lysogenized' and referred to as lysogens [9,  
74 10]. Prophages often encode accessory genes that can influence bacterial traits and  
75 behaviors [12]. These genes can encode virulence factors, antibiotic resistance genes,  
76 and those that provide superinfection exclusion, thereby protecting their bacterial hosts  
77 from infections by related phages [13]. Based on the site of integration, prophages can  
78 also impact the expression of bacterial genes [14]. Bacterial lysogens exist in every

79 environment [15-17] and are particularly prevalent in the microbiomes of diverse  
80 animals [8, 18].

81 Prophage induction results in bacterial lysis and can be mediated by various  
82 stressors, including antibiotics and inflammatory processes [19-27]. Because prophages  
83 can influence phenotypes, such as biofilm formation of their bacterial hosts [25],  
84 understanding the impact of lysogens in animal microbiomes is becoming a research  
85 priority [28-30]. In the gut, biofilms associated with host mucus may benefit the host by  
86 enhancing epithelial barriers against pathogenic invasion [31]. Integration of prophages  
87 into bacterial genomes may impart functional changes that could be important in surface  
88 colonization. For example, in *E. coli* K-12, integrating the Rac prophage into a tRNA  
89 thioltransferase region disrupts biofilm functions [32]; deleting this prophage decreases  
90 resistance to antibiotics, acids, and oxidative stress. Some of these traits may be  
91 regulated by prophage-specific genes [26]. Prophages have also been shown to  
92 influence biofilm lifecycles in *Pseudomonas aeruginosa* [33, 34].

93 Lysogenized *Shewanella* species colonize the gut of *Ciona robusta*, an ascidian  
94 collected in Southern California waters [35, 36] and from here on referred to as *Ciona*.  
95 Tunicates like *Ciona* are a subphylum (Tunicata) of Chordates that are well-established  
96 model systems for studies of animal development [37-39] and are now increasingly  
97 leveraged for gut immune and microbiome studies [40]. *Ciona* maintains stable gut  
98 bacterial and viral communities [17, 35] despite continuously filtering microbe-rich  
99 seawater and only possessing innate immunity. Previous efforts to define gut immunity  
100 in *Ciona* revealed the presence of a secreted immune effector, the variable  
101 immunoglobulin (V-Ig) domain-containing chitin-binding protein, or VCBP, that serves

102 important roles in shaping the ecology of the gut microbiome by binding bacteria and  
103 fungi (as well as chitin-rich mucus) on opposing functional domains [41, 42]. *Ciona*  
104 VCBP-C is one of the best-studied VCBPs, expressed in the stomach and the intestine  
105 and shown to bind bacteria *in vitro* and the gut lumen [42]. Based on various *in vitro* and  
106 *in vivo* observations, it was proposed that VCBPs likely modulate bacterial settlement  
107 and/or biofilm formation [40, 41, 43]. The potential influence of soluble immune effectors  
108 on host-bacterial-viral interactions is of considerable interest. However, the possibility  
109 that prophages may influence the interactions between bacteria and VCBPs remains to  
110 be explored. *Shewanella fidelis* strain 3313 was isolated previously from the gut of  
111 *Ciona*. It was shown to possess two inducible prophages, SfPat and SfMu [36], the  
112 latter of which is referred to as SfMu1 in the current manuscript. Furthermore, *in vitro*  
113 experiments demonstrated enhanced biofilm formation in *S. fidelis* 3313 in the presence  
114 of extracellular DNA (eDNA) that may originate from phage activity [36]. A link between  
115 phage-mediated lysis and biofilm formation has been demonstrated previously in other  
116 *Shewanella* species [34]. For example, in *S. oneidensis* strain MR-1, Mu and Lambda  
117 prophages enhance biofilm formation via eDNA released during prophage-induced lysis,  
118 with genomic DNA likely serving as a scaffold for biofilms [34]. Similarly, the P2  
119 prophage of *S. putrefaciens* strain W3-18-1 influences biofilm formation via  
120 spontaneous induction at low frequencies, resulting in cell lysis and contributing eDNA  
121 that can mediate biofilm formation [44].

122 Here, we set out to characterize the influence of prophages, SfPat and SfMu1, on  
123 their host, *S. fidelis* 3313. The genome assembly for *S. fidelis* 3313 was further refined  
124 by combining both long-read and short-read sequencing, resulting in improved

125 resolution of the genomic landscape of the prophages and associated regions. We then  
126 designed a homologous recombination-based deletion strategy to generate mutants  
127 with one or both prophages deleted, i.e., knocked-out. We report that prophage deletion  
128 results in reduced bacterial motility and increased biofilm formation *in vitro*. During gut  
129 colonization *in vivo*, these behavioral changes may affect expression of bacterial genes  
130 encoding signaling molecules as well as important host innate immune genes.  
131 Colonization of the gut in laboratory-reared *Ciona* juveniles using wild-type (WT) and  
132 prophage knockout (KO) mutant strains suggested that the influence of prophages on  
133 the outcome of bacterial colonization of the gut is also impacted by host genetics. The  
134 results reported herein reflect complex inter-kingdom interactions among prophages,  
135 bacterial hosts, and animal immune systems.

136

## 137 **Methods**

### 138 Culture and growth conditions

139 *S. fidelis* 3313 used in this study was originally isolated from the gut of *Ciona*  
140 *robusta* obtained from Mission Bay, CA, USA, as previously described [36]. The  
141 bacterium was cultured using Difco marine agar 2216 (MA) (Fisher Scientific, Hampton,  
142 NH) and marine broth (MB) at room temperature. Subsequent genetic manipulations  
143 were performed on strains grown in LB/MB, which consists of a mixture of 75% LB  
144 (Lysogeny Broth, Fisher Scientific, Hampton, NH) and 25% MB. Strains are listed in  
145 Table 1.

146

## 147 Genome Assembly

148           Genomic libraries were prepared from isolated colonies on MA and grown in MB  
149 using NuGen Ovation Ultralow DNA kit (Eurofins, Louisville KY) for Illumina sequencing  
150 and SMRTbell II for PacBio sequencing. Samples were sequenced on the Illumina  
151 MiSeq 2x250 bp platform (San Diego, CA, USA) and PacBio SMRT Cell (Pacific  
152 Biosciences, Menlo Park, CA, USA). Illumina-sequenced reads were quality-trimmed at  
153 Q=30 with Trimmomatic v0.36 [45] and co-assembled with PacBio-sequenced reads  
154 using Unicycler v0.4.8 [46]. Genome completion, strain heterogeneity, and  
155 contamination were assessed using checkM v1.0.9 [47]. Whole genome amino acid  
156 identity (AAI) was used to identify or verify taxonomy using compareM v0.0.2.3 [48]. The  
157 assembled genome was annotated by the Rapid Annotation using the Subsystem  
158 Technology (RAST) server [49]. Identification and annotation of prophage-encoding  
159 genome regions was performed with a software pipeline that included PhiSpy, VirSorter,  
160 PHASTER and VIBRANT [50-53].

161

## 162 Prophage deletion

163           Two prophages, SfPat and SfMu1, were targeted for deletion from *S. fidelis* 3313  
164 using homologous recombination methods adapted from Saltikov and Neuman [54] to  
165 produce single and double-knockout mutant strains. First, a pSMV3 suicide vector [54]  
166 was designed with ~700 bp regions corresponding to the upstream and downstream  
167 sequence of the prophages (Table 2). These flanking regions were amplified and ligated  
168 using overlap extension PCR, then directionally inserted into the vector with the  
169 restriction enzymes BamHI and SacI (Table 3) [55]. Plasmid conjugation was then

170 performed by inoculating a colony of *S. fidelis* 3313 into a culture of *E. coli* containing  
171 the desired suicide vector on an LB/MB agar plate for two hours.

172 To study the influence of prophages on *S. fidelis* 3313, two of the three  
173 prophages, SfPat and SfMu1, were targeted for deletion using homologous  
174 recombination. The third prophage, SfMu2, is larger (over 65 kb) and is being targeted  
175 as part of future efforts. To target SfMu1, primers EDK73/74 and EDK75/76 were  
176 designed to amplify 667 bp upstream and 752 bp downstream of the prophage (**Figure**  
177 **1a**). Flanking primers EDK83/84 were used for PCR screening of candidate deletion  
178 clones, amplifying 1607 bp in the event of a successful deletion and yielding no product  
179 in case of an unsuccessful deletion as the product is too large to amplify. To target  
180 SfPat, primers EDK77/78 and EDK79/80 were designed to amplify 773 bp upstream  
181 and 758 bp downstream of the prophage, respectively (**Figure 1b**). These upstream  
182 and downstream regions also contain the first 33 and last 95 bp, respectively, of SfPat.  
183 Flanking primers EDK81/82 were used for PCR screening of candidate colonies for  
184 SfPat deletion. The flanking primers produce a product of 1697 bp in the event of a  
185 successful deletion but otherwise yield a product over 10 kb between the flanking  
186 regions, which is a negative reaction under our PCR conditions. The full genomes of all  
187 strains were re-sequenced by Illumina sequencing (MiGS, University of Pittsburgh) to  
188 confirm the absence of additional genetic changes or mutations in either the upstream  
189 or downstream flanking regions of the deletion mutants (**Figures 1a and b**).

190

191 Fluorescent strains



192 Plasmids encoding fluorescent proteins were constructed using *E2 Crimson* (red  
193 fluorescence) and *egfp* (green fluorescence) genes, via restriction digestion and  
194 ligation, to pBBR1-MCS [56, 57]. The electroporation protocol was adapted from Corts  
195 *et al* [58]. Competent cells were made using 3 ml log-phase cultures of *S. fidelis*  
196 JG4066 and JG4063. The resulting cultures were pelleted by centrifugation and washed  
197 three times with 1M sorbitol and resuspended in 150  $\mu$ L of 1M sorbitol. Plasmids (100  
198 ng) were added to 50  $\mu$ L of competent cells, and electroporation was carried out at 1.4  
199 kV for 4 msec with 10  $\mu\Omega$  resistance. The transformants were maintained on LB/MB  
200 with 17  $\mu$ g/ml chloramphenicol.

201

202 *S. fidelis* crystal violet biofilm assay

203 WT and prophage KO strains were cultured in MB overnight at RT, and then  
204 diluted to  $10^7$  cfu/ml in MB. The cultures were brought to 2 ml final volume of MB in 12-  
205 well dishes and incubated at RT for 24 hrs to examine biofilm development. Each  
206 variable was tested in technical duplicate. Biofilms were quantified by crystal violet  
207 staining as previously described [59]. Briefly, supernatants were aspirated after 24-hour  
208 incubation and the biofilms were dried and stained with 0.1% crystal violet for 10 mins.  
209 The stained biofilms were then gently washed with deionized water, and the amount of  
210 biofilm produced was quantified as the intensity of the stain ( $OD_{570}$ ) after it was  
211 extracted from the biofilm with 30% acetic acid. All biofilm assays were performed at  
212 least in triplicates.

213

214 Motility assay

215           Soft-agar overlay motility assays were carried out in 12-well dishes to compare  
216 swimming behaviors [60, 61]. Briefly, a bacterial colony was cultured overnight at RT  
217 and then inoculated onto the center of soft agar (containing LB/MB and 0.5% low-melt  
218 agarose) and incubated at RT overnight. The results were recorded as the distance  
219 traveled (in millimeters) from the inoculation zone. Each variable was tested in  
220 duplicate. Two perpendicular distances (from the inoculation zone) were recorded and  
221 averaged for each well.

222

223 Congo red assay

224 A modified Congo red assay was adapted and implemented to infer internal cyclic-di-  
225 GMP levels [62]. Briefly, bacteria that were cultured overnight were adjusted to 0.05  
226 OD<sub>600</sub> in LB/MB with 0.04% Congo red in six-well dishes. After 24 hours, the  
227 supernatant was spun down at 8000 g for 1 min. OD<sub>490</sub> and OD<sub>750</sub> values were  
228 determined. OD<sub>750</sub>, an infra-red wavelength, was used for subtracting turbidity. LB/MB  
229 was used as blank while sterile LB/MB +0.04% Congo red was used as positive control.  
230 The value of OD<sub>490</sub> -OD<sub>750</sub> of the samples were subtracted from that of the positive  
231 control. This value represents the Congo red signal in the supernatant. Experiments  
232 were conducted in triplicates, and significance was calculated using an unpaired t-test.

233

234 *Ciona* mariculture

235           The *in vivo* colonization experiments were performed on animals reared under  
236 conditions termed “semi-germ-free” (SGF), which include minimal exposure to marine

237 microbes. SGF conditions include animals harvested under conventional approaches  
238 [63] but permanently maintained in 0.22 µm-filtered, conditioned artificial seawater  
239 (cASW), handled with gloves, and lids only carefully removed for water/media changes.  
240 cASW is prepared by conditioning ASW made with Instant Ocean™ in an in-house  
241 sump-aquarium system containing live rock and growth lights, along with sediment from  
242 San Diego, California; salinity is maintained at 32-34 parts per thousand (or grams per  
243 liter). Compared to germ-free [64] or SGF approaches, conventionally-reared (CR)  
244 includes a step-up exposure to 0.7 µm-filtered cASW that introduces marine bacteria  
245 more naturally. The SGF approach is considered an intermediate method of rearing that  
246 includes minimal microbial exposures while increasing developmental maturity  
247 (unpublished observations). The animals were reared at 20 °C from larval to juvenile  
248 stages. Since *Ciona* adults are acquired from Mission Bay, California to generate  
249 juveniles for each of the biological replicates, the wild-harvested animals offer wider  
250 genetic diversity than conventional model systems that have had their genetic diversity  
251 reduced or eliminated by controlled breeding practices.

252

### 253 Gut colonization assays

254 All bacterial strains were grown overnight at RT in MB and diluted to 10<sup>7</sup> cfu/ml in  
255 cASW after repeated washes. Metamorphic stage 4 (MS4) animals reared in six-well  
256 dishes in cASW were exposed to 5 ml of 10<sup>7</sup> cfu/ml bacteria in each well for one hour.  
257 MS4 animals are considered part of the 1<sup>st</sup> ascidian stages (post-settlement stages 1-6,  
258 whereas stage 7-8 and onwards are 2<sup>nd</sup> ascidian stages, and reflect young adult  
259 animals). MS4 juveniles can be identified as having a pair of protostigmata, or gill slits,

260 on each side of the animal [37]. These juveniles first initiate feeding via newly  
261 developed and opened siphons; before this, the gut remains closed, and the inside  
262 lumen is unexposed to the outside world. Following this initial exposure, or colonization  
263 for various time intervals, the plates were rinsed multiple times with cASW and replaced  
264 with fresh cASW. Five juveniles were chosen randomly for each treatment, pooled, and  
265 homogenized with a plastic pestle; live bacteria were counted by performing serial  
266 dilutions and enumerating colony-forming units (cfu) via spot-plating assays [65, 66].  
267 Each of the graphed data represents a biological replicate dataset from genetically  
268 distinct/ diverse backgrounds of *Ciona* (represented by separate live animal collection  
269 and spawning events). Statistical significance was calculated using Wilcoxon t-test by  
270 pooling data across three to six genetically diverse biological replicates.

271 Live bacteria in the gut were visualized using *BacLight* stains and previously  
272 described fluorescently labeled bacteria [67]. For *BacLight* staining, 1 ml of bacterial  
273 cultures were grown overnight at RT, pelleted, washed twice with cASW, and stained  
274 with 4  $\mu$ l of *BacLight* Red or *BacLight* Green for 15 mins in the dark. The stained  
275 cultures were washed twice with cASW, and then diluted to  $10^7$  cfu/ml with cASW. MS4  
276 animals in 6-well dishes were then exposed to 5 ml of this culture. Bacteria in the gut of  
277 animals were visualized after one hour on a Leica DMI 6000B stereoscope with a CY5  
278 fluorescent filter for *BacLight* Red and GFP filter for *BacLight* Green; and imaged-  
279 captured with a Hamamatsu ORCAII camera (model C10600-10B-H) and processed  
280 with the MetaMorph 7.10.4 imaging suite (Molecular Devices, Downingtown, PA).  
281 Visualization was also done with similar treatments and microscope settings using  
282 *Shewanella* 4066 – E2 Crimson and 4063-egfp.

283

284 RT-qPCR

285 To determine if the *Ciona* innate immune system can recognize and respond to  
286 the unique mutant strains, which differ only in the presence or absence of the  
287 prophages, reverse transcription-quantitative PCR (RT-qPCR) was performed. RNA  
288 was extracted using the RNA XS kit (Macherey-Nagel, Düren, Germany) from MS4  
289 *Ciona* juveniles that underwent gut colonization. Complementary DNA (cDNA) synthesis  
290 was performed with oligo-dT primers and random hexamers using the First Strand  
291 cDNA Synthesis Kit (Promega, Madison WI) following the manufacturer's instructions.  
292 Amplification was set up with the qPCR kit (Promega, Madison, WI) and carried out on  
293 an ABI7500 with an initial melting temperature of 95°C for 2 mins and 40 cycles of 95°C  
294 for 15 sec and 60°C for 1 min. Targeted genes, and their primers, are reported in Table  
295 4. Results from four distinct biological replicates are presented. Each replicate includes  
296 pooled *Ciona* juveniles from at least two wells of a 6-well dish. *Ciona* actin was  
297 referenced as an endogenous control. Data was analyzed using  $\Delta\Delta C_T$  method [68] and  
298 the ABI7500 software suite.

299 To identify candidate bacterial genes that are differentially regulated due to the  
300 presence of prophages, bacterial gene expression was studied *in vitro*. The bacterial  
301 strains and phage KOs were cultivated in six-well dishes using the same methodology  
302 described for biofilm assays. After 24 hours, the supernatant was discarded and RNA  
303 from the biofilm was extracted using the Zymo Research Direct-zol kit. cDNA synthesis  
304 and qPCR were carried out as described above. As bacterial settlement dynamics  
305 differed after deletion of prophages, appropriate regulatory genes were tested and are

306 listed in Table 4. Rho was identified as the most stable reference gene using RefFinder,  
307 which utilizes Bestkeeper, GeNorm, Normfinder and comparative  $\Delta C_T$  methods (**Figure**  
308 **S2** and Supplementary Table 2) [69-72].

309

310 Statistical analysis and data visualization

311 Statistical analysis and data visualization were carried out in R v4.2 [73]. Data  
312 were plotted with ggplot 3.3.5 [74]; the Beeswarm plot was constructed using  
313 ggbeeswarm 0.6 [75]. Beeswarm plots and statistics for motility assays were calculated  
314 using replicate averages [76]. Statistical significance was calculated using ggsignif  
315 package 0.6.3 or ggpubr0.4.0 [77, 78]. If the data were found to be normally distributed  
316 by Shapiro's test, then significance was calculated using an unpaired t-test. The  
317 Wilcoxon signed-rank test was used to calculate the significance of non-parametric  
318 data.

319

## 320 Results

321 *S. fidelis* 3313 genome assembly

322 The *S. fidelis* 3313 genome assembly resulted in 34 contigs totaling 4,901,198  
323 bp with a G+C content of 42.95%. These contigs, span~99.84% of the reference  
324 genome with only 0.04% possible contamination as evaluated by CheckM [47]. The two  
325 largest contigs (4,824,570 bp and 43,647 bp each) are predicted to encode 98.6% of  
326 the genome. Based on CompareM analysis, strain 3313 shares ~99% average amino  
327 acid identity with the *S. fidelis* ATCC BAA-318 isolate first identified in sediments of the  
328 South China Sea and ~93% of the genes are orthologous. Our previous size prediction

329 of the two prophages, SfMu1 and SfPat (Table 5), included some adjacent bacterial  
330 genomic DNA, indicating SfMu1 to be 45,796 bp [36]. Homology of the integrase gene  
331 product supports SfMu1 as a Mu-like phage [79]. Likewise, homology of the capsid  
332 proteins indicates that SfPat is a PM2-like phage [80]. These prophages are localized to  
333 Contig 1 of the current assembly (**Figure 2**).

334 A third inducible 60,137 bp prophage, encoding 68 open reading frames (ORFs),  
335 was also identified in the improved genome assembly. This third prophage is predicted  
336 to be most closely related to the MuSo1 phage component of *Shewanella* FJAT-53749  
337 (accession no. WP\_220070840.1) based on the similarity of its integrase, capsid, and  
338 protease sequences. Additional prophage ORFs encoding proteins matching MuSo1  
339 include structural proteins, terminase small unit (accession no. KOO57259.1), terminase  
340 large unit (accession no. WP\_168825185.1), and the Mu-like flu mu region (accession  
341 no. KJE44690.1) (Supplementary Table 1). Because of its similarity to the Mu family of  
342 phage proteins, this prophage is termed SfMu2. Additional sequence contigs that do not  
343 assemble to the main *S. fidelis* 3313 genome include at least three small contigs  
344 encoding potential phage ORFs.

345

346 Sequence verification of prophage deletion mutant strains

347 Colony PCR and single primer extension sequencing were both used to validate  
348 all deletions, using primers EDK81/82 for SfPat and EDK83/84 for SfMu1 (Table 3). All  
349 recovered amplicon sizes were consistent with predictions for SfPat and SFMu1  
350 deletions. The SfMu1 deletion strain was subsequently named JG4005 and the SfPat  
351 deletion was named JG3862 (Table 1). SfPat was further deleted from JG4005,

352 establishing a double mutant, JG4063. Genome sequencing of the deletion mutant  
353 strains did not reveal the significant introduction of any mutations or DNA modifications  
354 (Supplementary Figure S1a and S1b). These mutant strains were then used for *in vitro*  
355 and *in vivo* experiments to understand the potential role of prophages in shaping *S.*  
356 *fidelis* 3313 colonization dynamics in the gut of *Ciona*.

357

358 Prophage deletion modulates biofilm formation and motility in *S. fidelis* 3313

359 Deletion of prophage regions from *S. fidelis* 3313 contributed to an overall  
360 increase in biofilm formation as quantified by crystal violet staining (**Figure 3a**).

361 Specifically, we observed that the strains possessing a SfPat deletion alone, or with  
362 deletion of both prophages, demonstrate approximately 23% increased biofilm  
363 compared to wild-type (WT) strains, p-value of 0.026 and 0.028, respectively (**Figure**  
364 **3a**). To determine if the changes in biofilm formation is also accompanied by differential  
365 motility or chemotaxis in *S. fidelis* 3313, we studied bacterial swimming on simple semi-  
366 solid media. Bacterial motility was measured by the spread diameter from a primary  
367 inoculation point after an overnight incubation (**Figure 3b**). WT strains demonstrated the  
368 largest mean diameter of 8.21 mm. The deletion of SfMu1 and SfPat resulted in  
369 decreased diameters of 5.79 mm and 4.04 mm, respectively. Deleting both the  
370 prophages resulted in the smallest diameter of 3.58 mm.

371 We then wanted to see what regulatory mechanisms of bacterial physiology were  
372 impacted by the prophages. Bacterial biofilm formation is often regulated by secondary  
373 signaling molecules like cyclic-di-GMP (c-di-GMP) [81]. Components of extracellular  
374 matrix like exopolysaccharides, curli and/or cellulose are involved in biofilm formation



375 and known to bind to Congo red, a diazo dye [62]. While the presence of these  
376 components have not been shown in *Shewanella*, it has been used as an indirect  
377 measure of c-di-GMP in other gram-negative bacteria like *Agrobacterium* and  
378 *Pseudomonas* [62, 82] Using this principle, we carried out a Congo red assay to  
379 compare the uptake of Congo red by biofilms of the WT and phage-deleted mutant  
380 strains. When bacteria grow as biofilms in media containing Congo red, the dye is  
381 preferentially retained in the biofilm. Hence, less of the dye will be present in the  
382 supernatant and quantified by optical density. We found that Congo red was lower in the  
383 supernatant of the double KO mutant strain with enhanced biofilm formation, suggesting  
384 an increased production of compounds regulated by c-di-GMP (**Figure 3c**). Since  
385 swimming and biofilm formation behaviors are also dependent on quorum sensing  
386 mechanisms, we measured changes in the expression levels of genes regulating c-di-  
387 GMP by qPCR; three genes, *pleD*, *chitinase* and *pdeB*, were targeted.

388 The bacterial gene, *pdeB*, encodes a phosphodiesterase enzyme that degrades  
389 c-di-GMP and can serve as a negative regulator of motility, positive regulator of biofilm  
390 formation, and quorum sensing signal [83]. We performed an *in vitro* experiment using  
391 qPCR to quantify the expression of *pdeB* by bacteria recovered from either 24-hour  
392 biofilms (*in vitro*). Deletion of any prophages reduced the expression of *pdeB*, but only  
393 deletion of both prophages resulted in statistically significant reductions of *pdeB*  
394 expression (**Figure 3d**). The other genes did not reveal any statistically significant  
395 changes (data not included).

396

397 The influence of prophages on *Ciona* gut colonization by *S. fidelis* 3313.

398         Since motility and biofilm formation are essential to shaping the structure of  
399 bacterial communities that associate with animals, we investigated whether prophages  
400 could impact the ability of *S. fidelis* 3313 to colonize the *Ciona* gut. Colonization assays  
401 were performed on MS4 *Ciona* juveniles by exposing animals to individual WT and  
402 mutant strains as described above, repeating the experiments three times across  
403 juveniles of diverse genetic backgrounds, i.e., using gametes from distinct outbred  
404 adults.

405         MS4 *Ciona* juveniles were exposed for one hour to *BacLight* Green-stained WT  
406 and *BacLight* Red-stained double KO mutant variants. These experiments revealed  
407 differential localization to the stomach epithelium by the double KO strain and the  
408 esophagus by the WT variant (**Figure 4a**). Since *BacLight* is a vital dye that interacts  
409 with surface peptidoglycans, the experiment was also repeated with the same strains  
410 transformed to carry and express plasmids encoding fluorescent markers; e.g., WT  
411 strain carrying a plasmid encoding E2 Crimson and the double KO strain carrying a  
412 plasmid encoding EGFP (**Figure 4b**). The results of both experiments were identical.

413         One hour after exposure to the mutant strains, bacteria were recovered from  
414 animals and quantified by counting colony-forming units (cfu). Experiments were  
415 repeated on three separate occasions using juveniles from diverse genetic backgrounds  
416 (**Figure 4 c-e**). Retention of the double KO strain was consistently lower, 0.44-to-0.724-  
417 fold, compared to the WT strain. The SfPat KO revealed a statistically insignificant 1.3-  
418 to-1.5-fold increase in retention in all three rounds. The retention of SfMu1 KO was  
419 highly variable. Overall, each round gave similar trends (**Figure 4c-e**), but these

420 differences were not statistically significant when the data were pooled (Wilcoxon test,  
421 **Figure 4f**). Gut colonization dynamics between WT and  $\Delta$ SfPat $\Delta$ SfMu1 were also  
422 compared for various time points ranging from 1 hour to 24 hours (Supplementary  
423 Figure S3). At the 4 hr time point, the WT was significantly more abundant in the gut of  
424 MS4 animals, as compared to the double KO strain.

425

426 Host immune discrimination of prophage KO mutant strains

427 To determine if host immunity discriminates among *S. fidelis* 3313 strains  
428 differing only in the presence or absence of prophages, we examined the expression  
429 patterns of immune-related genes, such as interleukin-17 and IL17 receptor,  
430 complement component 3a (C3a) receptor, NF $\kappa$ -B, tumor necrosis factor alpha (TNF $\alpha$ ),  
431 and mannose-binding lectin (MBL) [84]. We also tested VCBP-C, a secreted immune  
432 effector expressed in the gut epithelium of *Ciona* [85], can bind (and opsonize) bacteria  
433 within the gut lumen [42], and influence biofilms *in vitro* [43]. After one hour of exposure  
434 to the *S. fidelis* 3313 mutant strains, changes were detected in the expression of VCBP-  
435 C. Up-regulation was noted when juveniles were exposed to phage KO mutant strains  
436 of *S. fidelis* 3313, compared to the WT strain (**Figure 5a**) by qPCR. For example, a  
437 significant three-fold overexpression (p-value 0.042) of VCBP-C was noted in *Ciona*  
438 exposed to the double KO compared to those exposed to the WT strain. Statistically  
439 significant two-fold increases in VCBP-C expression were also noted in *Ciona* juveniles  
440 exposed to the individual phage KOs mutant strains compared to colonization with the  
441 WT strain.

442 Additional innate immune components were also examined during colonization of  
443 MS4 juveniles by the same mutant strains (**Figure 5b**, Supplemental Figure S4). In  
444 experiments with 24 hr exposures and multiple biological replicates, we found that IL17-  
445 1, IL17 receptor and VCBP-C gene expression were upregulated in WT as compared to  
446 the double KO across multiple biological replicates; this pattern of VCBP-C expression  
447 is distinct from what was noted after 1 hr of exposure (see above; **Figure 5a**).

448

## 449 Discussion

450 In this study, a nearly completed genome of *S. fidelis* 3313 is provided by  
451 combining short- (Illumina sequencing) and long-read assemblies (PacBio sequencing),  
452 resulting in improved localization of two known prophages, SfPat and SfMu1. A third  
453 prophage, SfMu2, was also identified, and its genomic location was described. Using  
454 phage-cured mutants, it was observed that prophages of *S. fidelis* 3313 can result in  
455 increased swimming reduced biofilm formation and subsequently reduced c-di-GMP  
456 expression. These bacterial phenotypes affect host immune responses and gut  
457 colonization dynamics.

458 Biofilm formation and motility are often regulated by secondary signaling  
459 molecules like c-di-GMP [81]. In bacteria, motility and biofilm formation are regulated by  
460 the secondary signaling molecule c-di-GMP. Motility is inversely related to c-di-GMP  
461 levels while biofilm formation directly correlates with c-di-GMP levels [81]. Congo red  
462 binds to components of the biofilm matrix that are regulated by c-di-GMP. The Congo  
463 red assay revealed that the double KO mutants likely produce more biofilm components  
464 that are known to be regulated by c-di-GMP. This implies that double KO might express

465 increased amounts of c-di-GMP than WT [62]. We then monitored changes to the levels  
466 of an important regulatory enzyme of this dinucleotide. The phosphodiesterase *pdeB* is  
467 a known negative regulator of c-di-GMP and its expression has been shown to influence  
468 biofilm formation and motility in *S. oneidensis* [83]. We report that the deletion of  
469 prophages in *S. fidelis* 3313 results in decreased expression of *pdeB* in KO strains  
470 compared to the WT from overnight biofilms. While the same trends of *pdeB* gene  
471 expression were observed in bacteria recovered from the guts of MS4 *Ciona*, the  
472 combined biological replicates lacked statistical significance. Other factors likely  
473 influence bacterial c-di-GMP levels while inhabiting the gut of animals, and these  
474 concepts are being explored further.

475 Our data suggest an increase in the accumulation of c-di-GMP in the double KO  
476 mutant strain. Based on these results, we hypothesize that increased c-di-GMP in the  
477 prophage KO mutant strains leads to reduced motility and increased biofilm formation.  
478 Increased c-di-GMP levels have also been reported to reduce motility and impact biofilm  
479 morphology in *Vibrio fischeri* [86]. It has also been reported that the influence of a *Vibrio*  
480 *anguillarum* prophage is repressed by specific quorum sensing mechanisms and that  
481 this action increases biofilm formation [87]. Some prophages have also been shown to  
482 possess other genes that are responsible for shaping motility of *Pseudomonas*  
483 *aeruginosa* [88].

484 In this report, we find that prophages of *S. fidelis* 3313 only lead to increased  
485 retention in the gut at the 4-hour time point, as compared to the double KO. The  
486 influence on bacterial retention in the early hours of colonization could be biologically  
487 significant in an animal where water moves across the branchial basket continuously.

488 Our data also suggest the prophages can influence niche preference in the *Ciona* gut,  
489 and that the abundance of lysogens can fluctuate with time (Supplementary Figure S3) .  
490 The overall impact of prophages on host colonization may be obscured, in part, by the  
491 influence of host genetics as suggested by differential retention rates across *Ciona* from  
492 different genetic backgrounds (**Figure 4**). Of note, it was recently reported that the  
493 marine lytic phage, HLN01, has no apparent influence on how the bacterial symbiont,  
494 *Vibrio fischeri*, colonizes its natural host, the bobtail squid *Euprymna scolopes* [89].

495 Host immunity also plays an important role in shaping gut homeostasis. Distinct  
496 microbes and their antigens and/or metabolites can engage host immune responses  
497 [90]. Previously, human secretory immunoglobulin A (SIgA) was found to enhance and  
498 favor settlement dynamics of bacteria both *in vitro* and *in vivo* [91-94], raising a basic  
499 question as to whether this phenomenon is more widespread among other secretory  
500 immune effectors present in mucosal environments of animals [95]. We speculate that  
501 while prophages likely impact the behavior of lysogenized bacteria in ways that can  
502 influence colonization dynamics, interaction with VCBP-C on the mucosal surface of the  
503 *Ciona* gut may further influence settlement behaviors [43, 95]. Importantly, we show  
504 here that the presence of prophages leads to a reduced expression of *Ciona* VCBP-C in  
505 the first hours of colonization (a biologically relevant time), subsequently increasing with  
506 prolonged exposures.

507 We also observe that prophages stimulate IL17-based innate immune responses  
508 in *Ciona*. IL17 is a conserved cytokine [96], and its influence is crucial for mucosal  
509 immunity and enhancing barrier defenses and integrity [97]. The pathway is also known  
510 to stimulate the production of antimicrobial factors and the recruitment of immunocytes

511 [97]. In mice, it has been established that cells producing IL17 are important in  
512 regulating commensals [98]. We have shown here that WT (prophage-containing) *S.*  
513 *fidelis* 3313 evokes distinct IL17 responses compared to the prophage KO mutant  
514 strains (**Figure 5a** and **b**). While IL17 can act upstream of NF $\kappa$ -B, the data here reveal  
515 both genes have opposing regulatory patterns. These results imply that prophage-  
516 mediated bacterial stimulation of IL17 acts independently of NF $\kappa$ -B.

517 Our findings further support the hypothesis that the presence of prophages can  
518 alter the outcome of host colonization and immune response. It remains to be shown if  
519 prophages stimulate the production of a bacterial metabolite with immunomodulatory  
520 properties, or if the host immune system responds to differences in bacterial behaviors  
521 or traits that result from an absence of the prophage influence, such as excess biofilm  
522 formation.

523 Metagenomic sequencing of gut microbes from healthy animals has revealed that  
524 temperate lifestyles are prevalent among phages from these ecosystems [99-101], an  
525 observation also made in the *Ciona* gut [17]. The mechanisms by which prophages  
526 shape colonization behaviors among gut bacteria remain unclear. While the data  
527 reported here are only based on one bacterial strain that colonizes the *Ciona* gut, we  
528 find that lysogenized versions of *S. fidelis* colonize the gut with reduced activation of  
529 VCBP-C gene expression. These observations may be more widely applicable since  
530 lysogens are so abundant in animal microbiomes.

531 It remains unclear if VCBPs, which possess broad specificities and can bind a  
532 range of bacterial hosts, bind lysogenized bacteria with different affinities than their  
533 prophage-free counterparts. Since colonization of animal mucosal surfaces is an

534 ancient process [35], prophages and their integration into bacterial genomes have likely  
535 evolved to provide fitness benefits in these often-challenging environments. Determining  
536 the role of animal immunity in these exchanges is of broad interest. Because prophages  
537 can also be induced to generate lytic particles that lyse bacteria, they can play a  
538 valuable role in indirect protection mechanisms for the host [26, 102, 103]. Prophages  
539 can also contribute to the transfer of virulence factors [25, 104]; thus, it is possible that a  
540 role in shaping colonization dynamics is prioritized if it provides fitness benefits to the  
541 lysogenized bacteria. Future studies should clarify the relationship between secreted  
542 immune effectors and lysogenized bacteria in processes shaping settlement dynamics,  
543 which will provide key insights toward gaining a broader understanding of the  
544 microbiome and the multifactorial nature of homeostasis.

545

#### 546 Author contributions

547 O.N. designed, executed, and analyzed experiments and wrote and edited the  
548 manuscript, S.L.G., N.P., C.G.F.A., B.A.L., A.L., and E.D.K performed experiments and  
549 provided feedback and approved the manuscript, M.N.Y., S.J.L., and B.A.L. performed  
550 genome sequence analysis, assembly, and provided feedback and approved the  
551 manuscript, M.B. and J.A.G. helped interpret data, provided feedback and approved the  
552 manuscript, G.A.L. provided reagents, helped design deletion experiments, helped  
553 interpret data, and provided feedback and approved the manuscript, and L.J.D. funded  
554 most of the project, helped design experiments, interpret data, and helped write and edit  
555 the manuscript.

556

557

#### 558 Funding

559 This project was supported by NSF IOS-1456301 (L.J.D. and M.B.), NSF MCB-1817308  
560 (L.J.D), NSF IOS-2226050/51 (L.J.D. and J.G.), internal awards from the MCOM Deans  
561 Office, and the USF Institute for Microbiomes to L.J.D., an NSF GRFP award to B.A.L.,  
562 and a New Investigator Award to O.N. by USF.

563

#### 564 Acknowledgments

565 The authors would like to acknowledge the expert technical assistance of Anthony  
566 Greco and Amanda Garces for transmission electron microscopy, as well as Gary W.



567 Litman and John P. Cannon for expert feedback and guidance on earlier efforts of the  
568 project.

569

570

## 571 References

- 572 1. Li, H., et al., *The outer mucus layer hosts a distinct intestinal microbial niche*. Nat  
573 Commun, 2015. **6**: p. 8292.
- 574 2. Johansson, M.E., J.M. Larsson, and G.C. Hansson, *The two mucus layers of colon are  
575 organized by the MUC2 mucin, whereas the outer layer is a legislator of host-microbial  
576 interactions*. Proc Natl Acad Sci U S A, 2011. **108 Suppl 1**: p. 4659-65.
- 577 3. Duncan, K., K. Carey-Ewend, and S. Vaishnava, *Spatial analysis of gut microbiome  
578 reveals a distinct ecological niche associated with the mucus layer*. Gut Microbes, 2021.  
579 **13**(1): p. 1874815.
- 580 4. Harrington, V., et al., *Ecology and Medicine Converge at the Microbiome-Host Interface*.  
581 mSystems, 2021: p. e0075621.
- 582 5. Hornung, B., et al., *Studying microbial functionality within the gut ecosystem by systems  
583 biology*. Genes Nutr, 2018. **13**: p. 5.
- 584 6. Moran, N.A., H. Ochman, and T.J. Hammer, *Evolutionary and ecological consequences  
585 of gut microbial communities*. Annu Rev Ecol Evol Syst, 2019. **50**(1): p. 451-475.
- 586 7. Mirzaei, M.K. and C.F. Maurice, *Ménage à trois in the human gut: interactions between  
587 host, bacteria and phages*. Nature Reviews Microbiology, 2017. **15**(7): p. 397-408.
- 588 8. Shkoporov, A.N. and C. Hill, *Bacteriophages of the Human Gut: The "Known Unknown"  
589 of the Microbiome*. Cell Host & Microbe, 2019. **25**(2): p. 195-209.
- 590 9. Howard-Varona, C., et al., *Lysogeny in nature: mechanisms, impact and ecology of  
591 temperate phages*. The ISME journal, 2017. **11**(7): p. 1511-1520.
- 592 10. Lwoff, A., *Lysogeny*. Bacteriological reviews, 1953. **17**(4): p. 269-337.
- 593 11. Boling, L., et al., *Dietary prophage inducers and antimicrobials: toward landscaping the  
594 human gut microbiome*. Gut Microbes, 2020. **11**(4): p. 721-734.
- 595 12. Mills, S., et al., *Movers and shakers: influence of bacteriophages in shaping the  
596 mammalian gut microbiota*. Gut Microbes, 2013. **4**(1): p. 4-16.
- 597 13. Bondy-Denomy, J. and A.R. Davidson, *When a virus is not a parasite: the beneficial  
598 effects of prophages on bacterial fitness*. Journal of microbiology, 2014. **52**(3): p. 235-  
599 242.
- 600 14. Aziz, R.K., et al., *Mosaic prophages with horizontally acquired genes account for the  
601 emergence and diversification of the globally disseminated M1T1 clone of Streptococcus  
602 pyogenes*. Journal of bacteriology, 2005. **187**(10): p. 3311-3318.
- 603 15. Jiang, S.C. and J.H. Paul, *Significance of Lysogeny in the Marine Environment: Studies  
604 with Isolates and a Model of Lysogenic Phage Production*. Microbial Ecology, 1998.  
605 **35**(3): p. 235-243.
- 606 16. Silveira, C.B., A. Luque, and F. Rohwer, *The landscape of lysogeny across microbial  
607 community density, diversity and energetics*. Environmental Microbiology, 2021. **23**(8): p.  
608 4098-4111.
- 609 17. Leigh, B.A., et al., *The gut virome of the protochordate model organism, Ciona  
610 intestinalis subtype A*. Virus Research, 2018. **244**: p. 137-146.
- 611 18. Kim, M.-S. and J.-W. Bae, *Lysogeny is prevalent and widely distributed in the murine gut  
612 microbiota*. The ISME Journal, 2018. **12**(4): p. 1127-1141.
- 613 19. Allen, H.K., et al., *Antibiotics in feed induce prophages in swine fecal microbiomes*.  
614 MBio, 2011. **2**(6).

- 615 20. Banks, D.J., B. Lei, and J.M. Musser, *Prophage induction and expression of prophage-*  
616 *encoded virulence factors in group A Streptococcus serotype M3 strain MGAS315.* Infect  
617 Immun, 2003. **71**(12): p. 7079-86.
- 618 21. Diard, M., et al., *Inflammation boosts bacteriophage transfer between Salmonella spp.*  
619 Science, 2017. **355**(6330): p. 1211-1215.
- 620 22. Fang, Y., et al., *Induction of Shiga Toxin-Encoding Prophage by Abiotic Environmental*  
621 *Stress in Food.* Appl Environ Microbiol, 2017. **83**(19).
- 622 23. Garcia-Russell, N., B. Elrod, and K. Dominguez, *Stress-induced prophage DNA*  
623 *replication in Salmonella enterica serovar Typhimurium.* Infect Genet Evol, 2009. **9**(5): p.  
624 889-95.
- 625 24. Maiques, E., et al., *beta-lactam antibiotics induce the SOS response and horizontal*  
626 *transfer of virulence factors in Staphylococcus aureus.* J Bacteriol, 2006. **188**(7): p.  
627 2726-9.
- 628 25. Nanda, A.M., K. Thormann, and J. Frunzke, *Impact of spontaneous prophage induction*  
629 *on the fitness of bacterial populations and host-microbe interactions.* J Bacteriol, 2015.  
630 **197**(3): p. 410-9.
- 631 26. Wang, X., et al., *Cryptic prophages help bacteria cope with adverse environments.* Nat  
632 Commun, 2010. **1**: p. 147.
- 633 27. Zhang, X., et al., *Quinolone antibiotics induce Shiga toxin-encoding bacteriophages,*  
634 *toxin production, and death in mice.* J Infect Dis, 2000. **181**(2): p. 664-70.
- 635 28. Fortier, L.C. and O. Sekulovic, *Importance of prophages to evolution and virulence of*  
636 *bacterial pathogens.* Virulence, 2013. **4**(5): p. 354-65.
- 637 29. Hu, J., et al., *Prophage Activation in the Intestine: Insights Into Functions and Possible*  
638 *Applications.* Front Microbiol, 2021. **12**: p. 785634.
- 639 30. Lin, W., et al., *Identification of a Vibrio cholerae RTX toxin gene cluster that is tightly*  
640 *linked to the cholera toxin prophage.* Proceedings of the National Academy of Sciences,  
641 1999. **96**(3): p. 1071-1076.
- 642 31. Swidsinski, A., et al., *Comparative study of the intestinal mucus barrier in normal and*  
643 *inflamed colon.* Gut, 2007. **56**(3): p. 343-50.
- 644 32. Liu, X., et al., *Physiological Function of Rac Prophage During Biofilm Formation and*  
645 *Regulation of Rac Excision in Escherichia coli K-12.* Scientific Reports, 2015. **5**(1): p.  
646 16074.
- 647 33. Rice, S.A., et al., *The biofilm life cycle and virulence of Pseudomonas aeruginosa are*  
648 *dependent on a filamentous prophage.* The ISME Journal, 2009. **3**(3): p. 271-282.
- 649 34. Gödeke, J., et al., *Phage-induced lysis enhances biofilm formation in Shewanella*  
650 *oneidensis MR-1.* The ISME Journal, 2011. **5**(4): p. 613-626.
- 651 35. Dishaw, L.J., et al., *The gut of geographically disparate Ciona intestinalis harbors a core*  
652 *microbiota.* PLoS One, 2014. **9**(4): p. e93386.
- 653 36. Leigh, B., et al., *Isolation and characterization of a Shewanella phage–host system from*  
654 *the gut of the tunicate, Ciona intestinalis.* Viruses, 2017. **9**(3): p. 60.
- 655 37. Chiba, S., et al., *Development of Ciona intestinalis juveniles (through 2nd ascidian*  
656 *stage).* Zoolog Sci, 2004. **21**(3): p. 285-98.
- 657 38. Davidson, B., *Ciona intestinalis as a model for cardiac development.* Seminars in Cell &  
658 Developmental Biology, 2007. **18**(1): p. 16-26.
- 659 39. Liu, L.-P., et al., *Ciona intestinalis as an emerging model organism: Its regeneration*  
660 *under controlled conditions and methodology for egg dechoriation.* Journal of Zhejiang  
661 University SCIENCE B, 2006. **7**(6): p. 467-474.
- 662 40. Liberti, A., et al., *Reflections on the Use of an Invertebrate Chordate Model System for*  
663 *Studies of Gut Microbial Immune Interactions.* Frontiers in Immunology, 2021. **12**.
- 664 41. Liberti, A., et al., *A Soluble Immune Effector Binds Both Fungi and Bacteria via Separate*  
665 *Functional Domains.* Front Immunol, 2019. **10**: p. 369.

- 666 42. Dishaw, L.J., et al., *A role for variable region-containing chitin-binding proteins (VCBPs)*  
667 *in host gut–bacteria interactions*. Proceedings of the National Academy of Sciences,  
668 2011. **108**(40): p. 16747-16752.
- 669 43. Dishaw, L.J., et al., *Gut immunity in a protochordate involves a secreted*  
670 *immunoglobulin-type mediator binding host chitin and bacteria*. Nat Commun, 2016. **7**: p.  
671 10617.
- 672 44. Liu, X., et al., *Symbiosis of a P2-family phage and deep-sea Shewanella putrefaciens*.  
673 Environmental Microbiology, 2019. **21**(11): p. 4212-4232.
- 674 45. Bolger, A.M., M. Lohse, and B. Usadel, *Trimmomatic: a flexible trimmer for Illumina*  
675 *sequence data*. Bioinformatics, 2014. **30**(15): p. 2114-20.
- 676 46. Wick, R.R., et al., *Unicycler: resolving bacterial genome assemblies from short and long*  
677 *sequencing reads*. PLoS computational biology, 2017. **13**(6): p. e1005595.
- 678 47. Parks, D.H., et al., *CheckM: assessing the quality of microbial genomes recovered from*  
679 *isolates, single cells, and metagenomes*. Genome Res, 2015. **25**(7): p. 1043-55.
- 680 48. Parks, D., *CompareM: Comparative Genomic Statistics*. 2020: githuv.
- 681 49. Aziz, R.K., et al., *The RAST Server: Rapid Annotations using Subsystems Technology*.  
682 BMC Genomics, 2008. **9**(1): p. 75.
- 683 50. Kieft, K., Z. Zhou, and K. Anantharaman, *VIBRANT: automated recovery, annotation and*  
684 *curation of microbial viruses, and evaluation of viral community function from genomic*  
685 *sequences*. Microbiome, 2020. **8**(1).
- 686 51. Roux, S., et al., *VirSorter: mining viral signal from microbial genomic data*. PeerJ, 2015.  
687 **3**: p. e985.
- 688 52. Arndt, D., et al., *PHASTER: a better, faster version of the PHAST phage search tool*.  
689 Nucleic Acids Research, 2016. **44**(W1): p. W16-W21.
- 690 53. Akhter, S., R.K. Aziz, and R.A. Edwards, *PhiSpy: a novel algorithm for finding prophages*  
691 *in bacterial genomes that combines similarity- and composition-based strategies*.  
692 Nucleic Acids Research, 2012. **40**(16): p. e126-e126.
- 693 54. Saltikov, C.W. and D.K. Newman, *Genetic identification of a respiratory arsenate*  
694 *reductase*. Proceedings of the National Academy of Sciences, 2003. **100**(19): p. 10983-  
695 10988.
- 696 55. Bryksin, A.V. and I. Matsumura, *Overlap extension PCR cloning: a simple and reliable*  
697 *way to create recombinant plasmids*. BioTechniques, 2010. **48**(6): p. 463-465.
- 698 56. Barbier, M. and F.H. Damron, *Rainbow Vectors for Broad-Range Bacterial Fluorescence*  
699 *Labeling*. PLOS ONE, 2016. **11**(3): p. e0146827.
- 700 57. Kovach, M.E., et al., *pBBR1MCS: a broad-host-range cloning vector*. Biotechniques,  
701 1994. **16**(5): p. 800-2.
- 702 58. Corts, A.D., et al., *A new recombinering system for precise genome-editing in*  
703 *Shewanella oneidensis strain MR-1 using single-stranded oligonucleotides*. Scientific  
704 Reports, 2019. **9**(1): p. 39.
- 705 59. Liberti, A., et al., *A Role for Secreted Immune Effectors in Microbial Biofilm Formation*  
706 *Revealed by Simple In Vitro Assays*, in *Immune Receptors: Methods and Protocols*, J.  
707 Rast and K. Buckley, Editors. 2022, Springer US: New York, NY. p. 127-140.
- 708 60. Wolfe, A.J. and H.C. Berg, *Migration of bacteria in semisolid agar*. Proc Natl Acad Sci U  
709 S A, 1989. **86**(18): p. 6973-7.
- 710 61. Kearns, D.B., *A field guide to bacterial swarming motility*. Nat Rev Microbiol, 2010. **8**(9):  
711 p. 634-44.
- 712 62. Jones, C.J. and D.J. Wozniak, *Congo Red Stain Identifies Matrix Overproduction and Is*  
713 *an Indirect Measurement for c-di-GMP in Many Species of Bacteria*, in *c-di-GMP*  
714 *Signaling: Methods and Protocols*, K. Sauer, Editor. 2017, Springer New York: New  
715 York, NY. p. 147-156.

- 716 63. Cirino, P., et al., *Laboratory culture of the ascidian Ciona intestinalis (L.): a model*  
717 *system for molecular developmental biology research*, in *Mar. Mod. Elec. Rec. [serial*  
718 *online]*. 2002.
- 719 64. Leigh, B.A., A. Liberti, and L.J. Dishaw, *Generation of Germ-Free Ciona intestinalis for*  
720 *Studies of Gut-Microbe Interactions*. *Front Microbiol*, 2016. **7**: p. 2092.
- 721 65. Gaudy Jr, A., F. Abu-Niaaj, and E. Gaudy, *Statistical study of the spot-plate technique*  
722 *for viable-cell counts*. *Applied microbiology*, 1963. **11**(4): p. 305-309.
- 723 66. Miles, A.A., S. Misra, and J. Irwin, *The estimation of the bactericidal power of the blood*.  
724 *Epidemiology & Infection*, 1938. **38**(6): p. 732-749.
- 725 67. Boulos, L., *Pré vost M, Barbeau B, Coallier J, Desjardins R. LIVE/DEAD BacLight:*  
726 *application of a new rapid staining method for direct enumeration of viable and total*  
727 *bacteria in drinking water*. *J Microbiol Methods*, 1999. **37**: p. 77-86.
- 728 68. Pfaffl, M.W., *A new mathematical model for relative quantification in real-time RT-PCR*.  
729 *Nucleic Acids Res*, 2001. **29**(9): p. e45.
- 730 69. Xie, F., et al., *miRDeepFinder: a miRNA analysis tool for deep sequencing of plant small*  
731 *RNAs*. *Plant Mol Biol*, 2012.
- 732 70. Pfaffl, M.W., et al., *Determination of stable housekeeping genes, differentially regulated*  
733 *target genes and sample integrity: BestKeeper–Excel-based tool using pair-wise*  
734 *correlations*. *Biotechnology letters*, 2004. **26**: p. 509-515.
- 735 71. Andersen, C.L., J.L. Jensen, and T.F. Ørntoft, *Normalization of real-time quantitative*  
736 *reverse transcription-PCR data: a model-based variance estimation approach to identify*  
737 *genes suited for normalization, applied to bladder and colon cancer data sets*. *Cancer*  
738 *research*, 2004. **64**(15): p. 5245-5250.
- 739 72. Vandesompele, J., et al., *Accurate normalization of real-time quantitative RT-PCR data*  
740 *by geometric averaging of multiple internal control genes*. *Genome biology*, 2002. **3**(7):  
741 p. 1-12.
- 742 73. Team, R.C., *R : A language and environment for statistical computing*. 2021.
- 743 74. Wickham, H., *ggplot2: Elegant Graphics for Data Analysis*. 2016.
- 744 75. Eklund, A.T., James, *The Bee Swarm Plot, an Alternative to Stripchart*. 2021: github.
- 745 76. Lord, S.J., et al., *SuperPlots: Communicating reproducibility and variability in cell*  
746 *biology*. *Journal of Cell Biology*, 2020. **219**(6).
- 747 77. Kassambara, A., *ggpubr: 'ggplot2' Based Publication Ready Plots*. 2020: github.
- 748 78. Constantin, A.-E.P., Indrajeet, *{ggsignif}: R Package for Displaying Significance Brackets*  
749 *for {'ggplot2'}*. 2021: PsyArxiv.
- 750 79. Harshey, R.M., *Phage Mu*. 1988, Springer US. p. 193-234.
- 751 80. Männistö, R.H., et al., *The Complete Genome Sequence of PM2, the First Lipid-*  
752 *Containing Bacterial Virus To Be Isolated*. *Virology*, 1999. **262**(2): p. 355-363.
- 753 81. Jenal, U. and J. Malone, *Mechanisms of Cyclic-di-GMP Signaling in Bacteria*. *Annual*  
754 *Review of Genetics*, 2006. **40**(1): p. 385-407.
- 755 82. Heindl, J.E., et al., *Reciprocal control of motility and biofilm formation by the PdhS2 two-*  
756 *component sensor kinase of Agrobacterium tumefaciens*. *Microbiology*, 2019. **165**(2): p.  
757 146-162.
- 758 83. Chao, L., et al., *PdeB, a Cyclic Di-GMP-Specific Phosphodiesterase That Regulates*  
759 *Shewanella oneidensis MR-1 Motility and Biofilm Formation*. *Journal of Bacteriology*,  
760 **195**(17): p. 3827-3833.
- 761 84. Marino, R., et al., *Environmental stress and nanoplastics' effects on Ciona robusta:*  
762 *regulation of immune/stress-related genes and induction of innate memory in pharynx*  
763 *and gut*. *Frontiers in Immunology*, 2023. **14**: p. 1176982.
- 764 85. Liberti, A., et al., *An immune effector system in the protochordate gut sheds light on*  
765 *fundamental aspects of vertebrate immunity*. *Pathogen-Host Interactions: Antigenic*  
766 *Variation v. Somatic Adaptations*, 2015: p. 159-173.

- 767 86. Isenberg, R.Y., et al., *High levels of cyclic diguanylate interfere with beneficial bacterial*  
768 *colonization*. *Mbio*, 2022. **13**(4): p. e01671-22.
- 769 87. Tan, D., et al., *High cell densities favor lysogeny: induction of an H2O prophage is*  
770 *repressed by quorum sensing and enhances biofilm formation in Vibrio anguillarum*. *The*  
771 *ISME Journal*, 2020. **14**(7): p. 1731-1742.
- 772 88. Tsao, Y.-F., et al., *Phage Morons Play an Important Role in Pseudomonas aeruginosa*  
773 *Phenotypes*. *Journal of Bacteriology*, 2018. **200**(22): p. e00189-18.
- 774 89. Lynch, J.B., et al., *Independent host- and bacterium-based determinants protect a model*  
775 *symbiosis from phage predation*. *Cell Reports*, 2022. **38**(7): p. 110376.
- 776 90. Rooks, M.G. and W.S. Garrett, *Gut microbiota, metabolites and host immunity*. *Nature*  
777 *Reviews Immunology*, 2016. **16**(6): p. 341-352.
- 778 91. Bollinger, R.R., et al., *Secretory IgA and mucin-mediated biofilm formation by*  
779 *environmental strains of Escherichia coli: role of type 1 pili*. *Mol Immunol*, 2006. **43**(4): p.  
780 378-87.
- 781 92. Thomas, A.D. and W. Parker, *Cultivation of epithelial-associated microbiota by the*  
782 *immune system*. *Future Microbiol*, 2010. **5**(10): p. 1483-92.
- 783 93. Pratt, L.A. and R. Kolter, *Genetic analysis of Escherichia coli biofilm formation: roles of*  
784 *flagella, motility, chemotaxis and type I pili*. *Mol Microbiol*, 1998. **30**(2): p. 285-93.
- 785 94. Donaldson, G.P., et al., *Gut microbiota utilize immunoglobulin A for mucosal*  
786 *colonization*. *Science*, 2018.
- 787 95. Dishaw, L.J., et al., *Immune-directed support of rich microbial communities in the gut*  
788 *has ancient roots*. *Dev Comp Immunol*, 2014.
- 789 96. Roberts, S., et al., *Rapid accumulation of an interleukin 17 homolog transcript in*  
790 *Crassostrea gigas hemocytes following bacterial exposure*. *Developmental &*  
791 *Comparative Immunology*, 2008. **32**(9): p. 1099-1104.
- 792 97. Abusleme, L. and N. Moutsopoulos, *IL-17: overview and role in oral immunity and*  
793 *microbiome*. *Oral Diseases*, 2017. **23**(7): p. 854-865.
- 794 98. Kumar, P., et al., *Intestinal Interleukin-17 Receptor Signaling Mediates Reciprocal*  
795 *Control of the Gut Microbiota and Autoimmune Inflammation*. *Immunity*, 2016. **44**(3): p.  
796 659-671.
- 797 99. Minot, S., et al., *The human gut virome: inter-individual variation and dynamic response*  
798 *to diet*. *Genome Res*, 2011. **21**(10): p. 1616-25.
- 799 100. Minot, S., et al., *Rapid evolution of the human gut virome*. *Proc Natl Acad Sci U S A*,  
800 2013. **110**(30): p. 12450-5.
- 801 101. Reyes, A., et al., *Viruses in the faecal microbiota of monozygotic twins and their*  
802 *mothers*. *Nature*, 2010. **466**(7304): p. 334-8.
- 803 102. Barr, J.J., et al., *Bacteriophage adhering to mucus provide a non-host-derived immunity*.  
804 *Proc Natl Acad Sci U S A*, 2013. **110**(26): p. 10771-6.
- 805 103. Wang, X., et al., *Cryptic prophages help bacteria cope with adverse environments*.  
806 *Nature Communications*, 2010. **1**(1): p. 147.
- 807 104. Wagner, P.L. and M.K. Waldor, *Bacteriophage control of bacterial virulence*. *Infect*  
808 *Immun*, 2002. **70**(8): p. 3985-93.
- 809 105. Liberti, A., et al., *Chitin protects the gut epithelial barrier in a protochordate model of*  
810 *DSS-induced colitis*. *Biology Open*, 2018. **7**(1).
- 811 106. Liberti, A., et al., *Transcriptional and proteomic analysis of the innate immune response*  
812 *to microbial stimuli in a model invertebrate chordate*. *Front Immunol*, 2023. **14**: p.  
813 1217077.
- 814  
815  
816

817

## 818 Figure Legends

819

820 Figure 1. Schematic illustration of deletion strategy. a) Location of upstream,  
821 downstream and flanking primers used in the deletion of SfMu1, b) Location of  
822 upstream, downstream and flanking primers used in deletion of SfPat.

823

824 Figure 2. Schematic representation of the *S. fidelis* 3313 genomes to illustrate the  
825 relative positions of each prophage. The figure represents the largest contig after  
826 assembly.

827

828 Figure 3. Effects of prophages on biofilm and swimming in *S. fidelis* 3313, a) Effect of  
829 prophages on *in vitro* biofilm formation over 24 hours quantified with crystal violet assay  
830 (n=3), b) Role of prophages in swimming (or chemotaxis) quantified as diameter of  
831 growth on soft agar after 24 hours (n=6), and c) Congo red assay to infer levels of  
832 cyclic-di-GMP from bacteria grown as biofilm at 24 hours n=3), d) Fold change of *pdeB*  
833 with Rho as internal control from 24-hour biofilm (*in vitro*), n=3, (\*= p-value<0.05, \*\*= p-  
834 value<0.01).

835

836 Figure 4. Prophage influence on bacterial colonization of the gut. a) *Ciona* MS4 reveal  
837 differential colonization of WT stained with BacLight Green in the esophagus and  
838 double KO stained by BacLight Red lines the stomach, b) *Ciona* MS4 reveals WT with  
839 E2 Crimson plasmid found in the esophagus while double KO with egfp plasmid lining  
840 the stomach. Both visualizations were observed one-hour post-colonization, c-e) Three  
841 biological replicates of bacterial colonization from MS4 juveniles exposed to prophage  
842 KO variants for one hour, e) Pooled rounds of three biological replicates where no  
843 significance is observed for gut colonization, and f) Fold-change of VCBP-C gene  
844 expression, with actin as an internal control, in MS4 juveniles exposed to prophage KO  
845 variants for one hour (n=4) (\*= p-value<0.05, \*\*= p-value<0.01).

846

847 Figure 5. Innate immunity is influenced by prophages. a) VCBP-C gene expression in  
848 MS4 juveniles after 1-hour exposure to *Shewanella fidelis* strains with and without  
849 phages, n=4, b) Innate immune gene expression in MS4 juveniles after 24-hour  
850 exposure to *Shewanella* strains with and without phages, n=3.

851

## 852 Data availability

853 *S. fidelis* 3313 strains submitted under the BioProject [PRJNA903273](https://www.ncbi.nlm.nih.gov/bioproject/PRJNA903273) on NCBI, accession  
854 number SAMN31793880 ID:31793880

855

856 **Table 1:** *S. fidelis* 3313 strains

| Organism | Phenotype                     | Biosample     |
|----------|-------------------------------|---------------|
| JG4066   | WT                            | SAMN317993881 |
| JG4005   | $\Delta$ SfMu1                | SAMN317993882 |
| JG3862   | $\Delta$ SfPat                | SAMN317993883 |
| JG4063   | $\Delta$ SfMu1 $\Delta$ SfPat | SAMN317993884 |

857  
858  
859  
860

**Table 2:** Plasmids used in the study.

| Strains/<br>Plasmids  | Genotype                                                                                                                                                                                                                                                                                                            | Source/<br>Reference |
|-----------------------|---------------------------------------------------------------------------------------------------------------------------------------------------------------------------------------------------------------------------------------------------------------------------------------------------------------------|----------------------|
| UQ950                 | <i>E. coli</i> DH5 $\alpha$ $\lambda$ (pir) host for cloning; F <sup>-</sup> $\Delta$ ( <i>argF-lac</i> )169 $\phi$ 80 <i>dlacZ58</i> ( $\Delta$ M15) <i>glnV44</i> (AS) <i>rfdD1</i> <i>gyrA96</i> (NalR) <i>recA1</i> <i>endA1</i> <i>spoT1</i> <i>thi-1</i> <i>hsdR17</i> <i>deoR</i> $\lambda$ pir <sup>+</sup> | [54]                 |
| pSMV3- $\Delta$ SfPat | pSMV3 with 778 bp upstream and 779 bp downstream of flanking regions of SfPat                                                                                                                                                                                                                                       | This study           |
| pSMV3- $\Delta$ SfMu1 | pSMV3 with 687 bp upstream and 772 bp downstream of flanking regions of SfPat                                                                                                                                                                                                                                       | This study           |
| pBRR1-E2Crimson       | E2.Crimson [56] added to pBRR1.MCS[57]                                                                                                                                                                                                                                                                              | This study           |
| pBRR1-egfp-ChIR       | egfp [56] added to pBRR1.MCS[57]                                                                                                                                                                                                                                                                                    | This study           |

861  
862  
863

**Table 3:** Primer sequences used in the construction of prophage knockouts.

| Primer ID | Sequence (5'-3')                 |
|-----------|----------------------------------|
| EDK 73    | AAACGGATCCAAGAGTTACTAGTGGCGTTTG  |
| EDK 74    | CAAGCTCAAGCCAGTCAAATCAAAGGTAGGT  |
| EDK 75    | ATTTGACTGGCTTGAGCTTGTGAACATCG    |
| EDK 76    | ACACGAGCTCAAGTCTGCCAAGTCGTAGG    |
| EDK 77    | AAATGGATCCCGATCAGCCTGCTAGTTTATT  |
| EDK 78    | ACGGAATAGGTTGAATGCGACTCAGGC      |
| EDK 79    | TCGCATTCAACCTATTCCGTCATGTTTAGCC  |
| EDK 80    | ACATGAGCTCGATGCAGATAAAGAGCCGTAAA |
| EDK 81    | GTTTATTTTGTGGCAATCGCA            |
| EDK 82    | GGTAGCAGTGCTTAAACGAT             |
| EDK 83    | AAAAGTGAAGCAGGTCAAGG             |
| EDK 84    | GACAGGGCAACTTCAACAAG             |

864  
865  
866  
867

**Table 4 :** Genes targeted and the reverse transcription- qPCR primers used in this study.

| Gene   | Function                            | Genbank accession no. | Primer (5'-3')          | Reference |
|--------|-------------------------------------|-----------------------|-------------------------|-----------|
| VCBP-C | Secreted immune effector in the gut | HQ324151              | f-AGACCAACGCCAACACAGTA  | [105]     |
| VCBP-C |                                     |                       | r-CCCATACATTGCAGCATTTTC |           |
| Actin  | Cytoskeletal Actin (Reference)      | AJ297725              | f-CCCAAATCATGTTTCGAAACC | [105]     |
| Actin  |                                     |                       | r-ACACCATCACCCTGTGCGAA  |           |

|              |                                        |                |                          |            |
|--------------|----------------------------------------|----------------|--------------------------|------------|
| IL17-1       | Interleukin 17                         | NM_001129875.1 | f-AGGTTAAGAATCCCTATGGTGC | [106]      |
| IL17-1       |                                        |                | r-CAAAGGCACAGACGCAAAGG   |            |
| IL17-1 rcptr | Interleukin 17 Receptor                | NM_001245045   | f-TGTTGGCATGAGTGTTCGGT   |            |
| IL17-1 rcptr |                                        |                | r-AGTTGGTTCTGCCCAAAGT    |            |
| NFκ-B        | Nuclear factor kappa beta              | NM_001078304   | f-TGTCGCTTGTTCGTCATGGAA  | [106]      |
| NFκ-B        |                                        |                | r-AACACCCAAGACCGTCGAAA   |            |
| TNFα         | Tumor Necrosis Factor                  | NM_001128107.1 | f-TTCAGAAAGATTGGACGACGA  | [106]      |
| TNFα         |                                        |                | r-TCGTTTAGAAATGCTGCTGTGG |            |
| C3a-rcptr    | Complement component 3 receptor        | NM_001078552.1 | f-TTGTAAGCTGGCACAAGGTGT  | This study |
| C3a-rcptr    |                                        |                | r-GACCGTAGTCTGGTAGAGGTC  |            |
| MBL          | Mannose Binding Lectin                 | NM_001167707.2 | f-TTATTGATGGGAAAGTTTGGT  | This study |
| MBL          |                                        |                | r-TAACATCTCTGTTCTTGGGTC  |            |
| pdeB         | Phosphodiesterase                      | NF012772.3     | f-GCATCAGGGCTCTTACCAATAG | This study |
| pdeB         |                                        |                | r-GAGGCGGTGATCCTTACAGATA |            |
| RecA         | Recombinase – Bacterial Reference gene |                | f-CGTAGTGGTGCGGTAGATGT   | This study |
| RecA         |                                        |                | r-CGCATTGCTTGGCTCATCAT   |            |

868

869 **Table 5:** Identification of prophages in *S. fidelis* 3313 genome

| Phage | Contig | Range Start | Range End | Length (bp) | Proteins (number) | Phage type identity (Region showing identity) |
|-------|--------|-------------|-----------|-------------|-------------------|-----------------------------------------------|
| SfMu2 | 1      | 1630281     | 1690417   | 60137       | 68                | Mu (MuSo1)                                    |
| SfPat | 1      | 2100478     | 2116061   | 15584       | 34                | PM2 or unclassified Corticovirus              |
| SfMu1 | 1      | 3996436     | 4023728   | 27293       | 21                | Mu                                            |

870

871

872

873

874

875

876



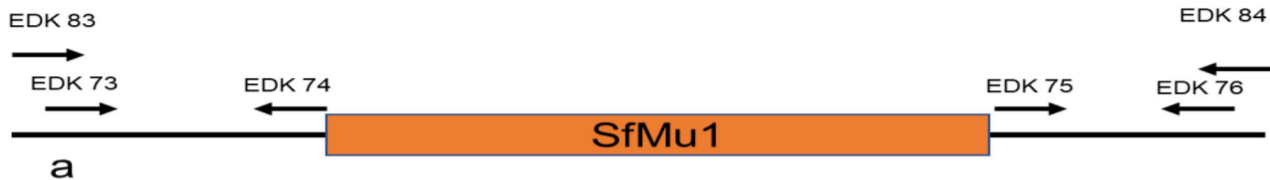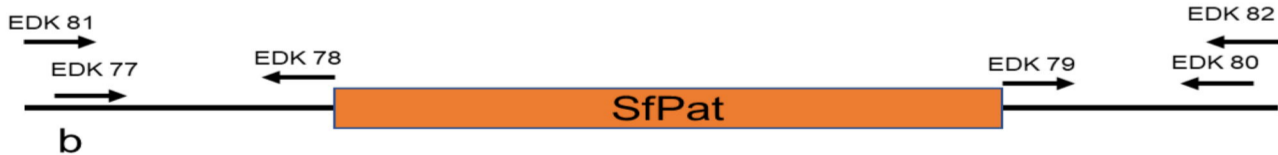

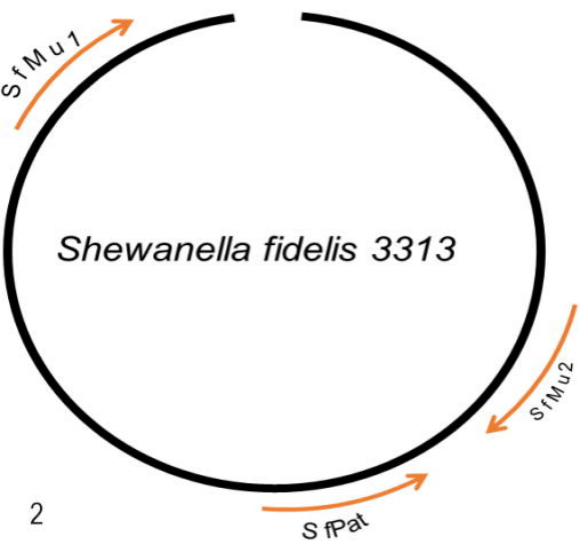

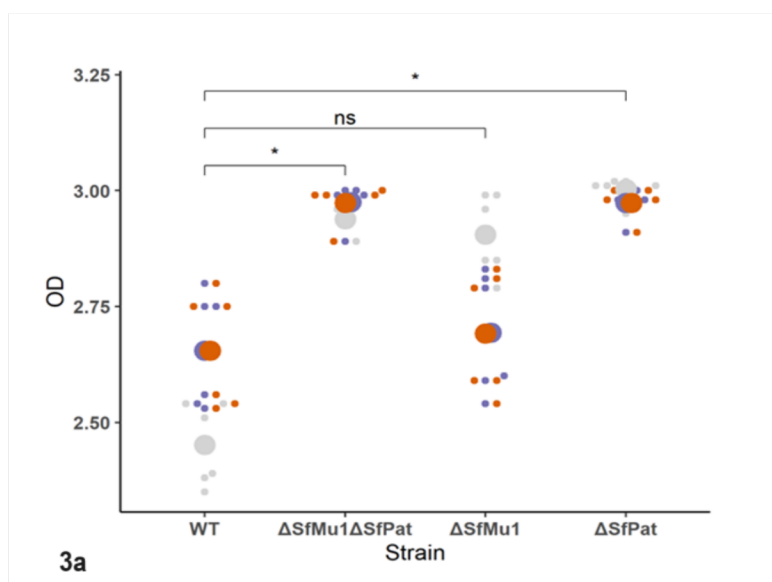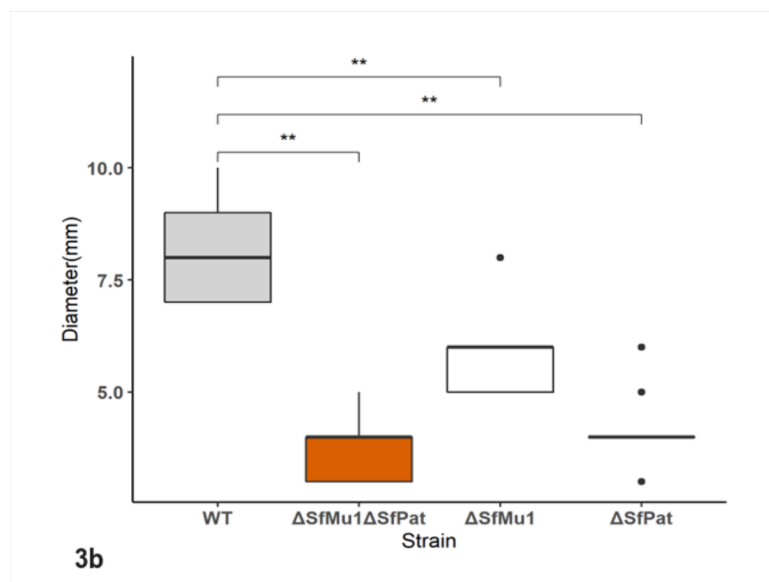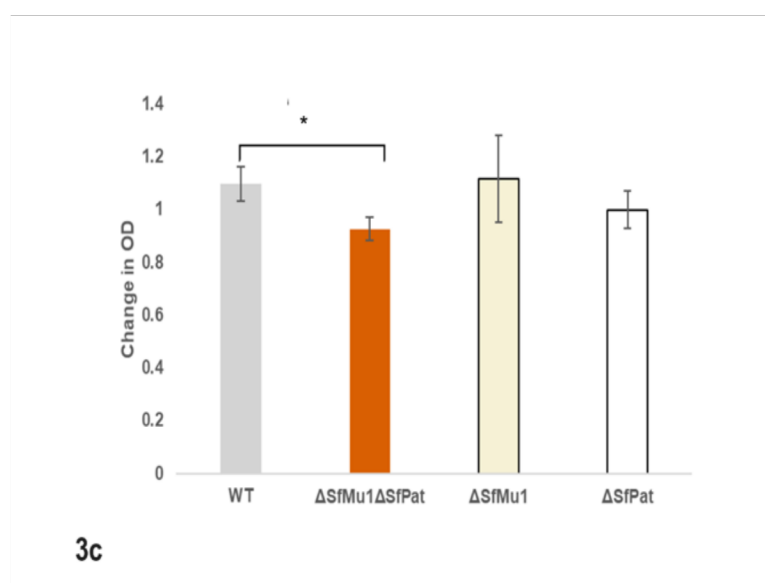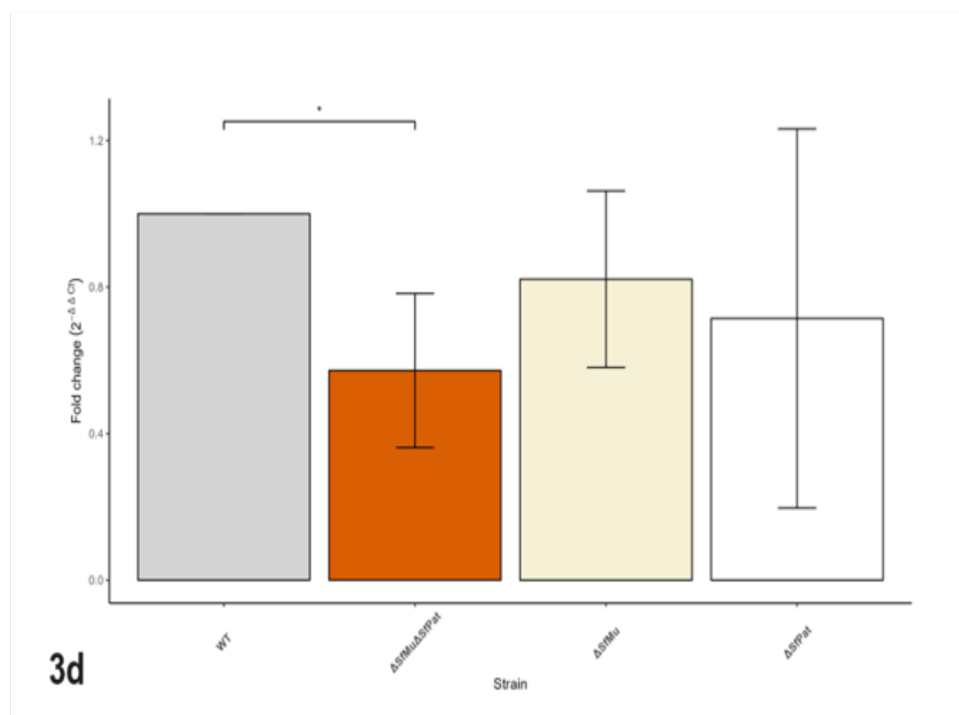

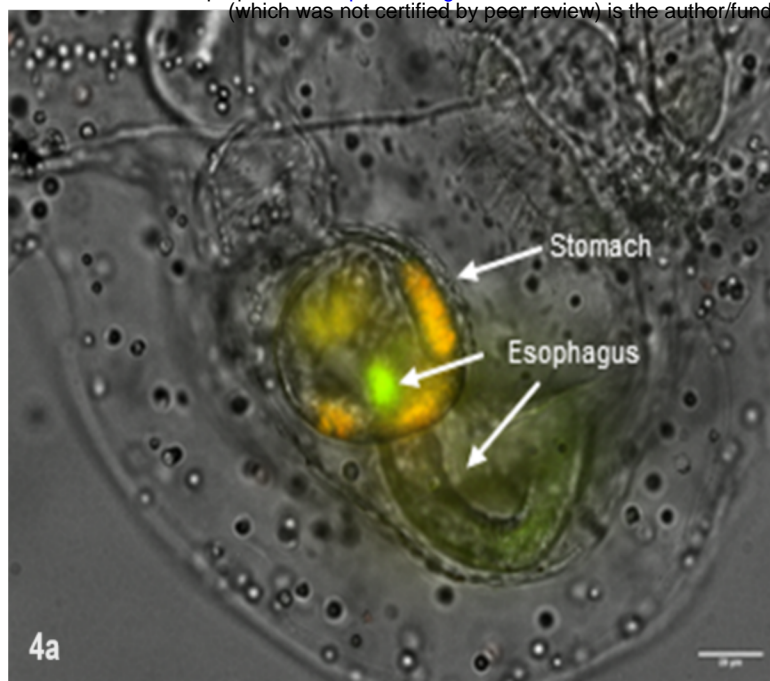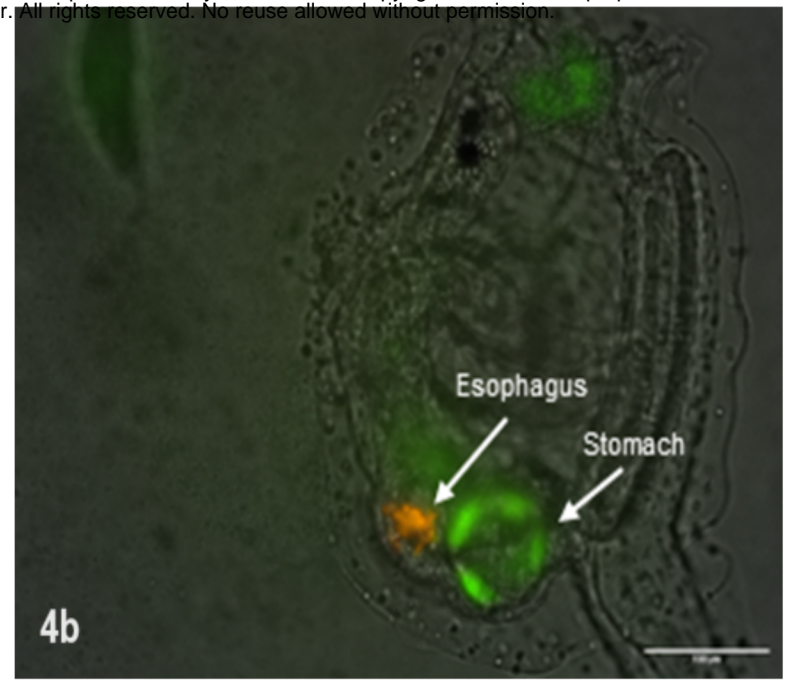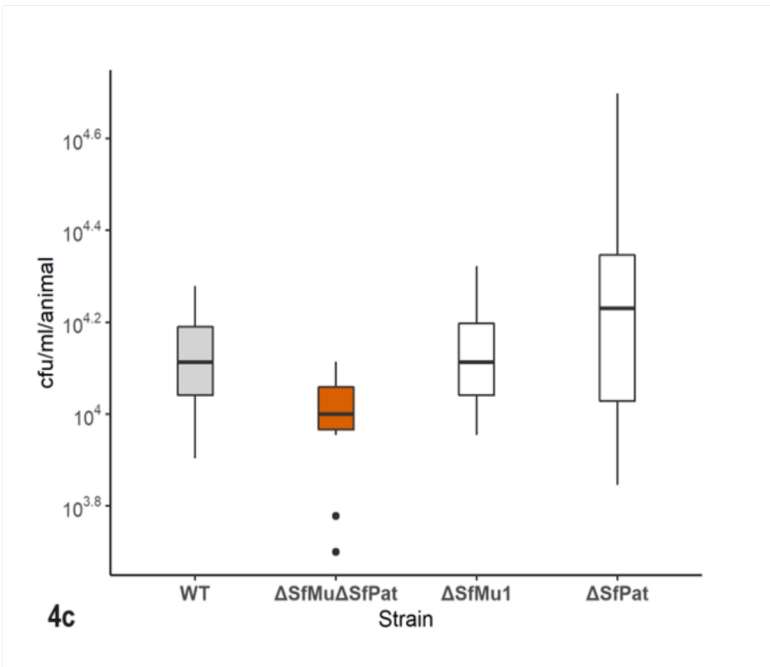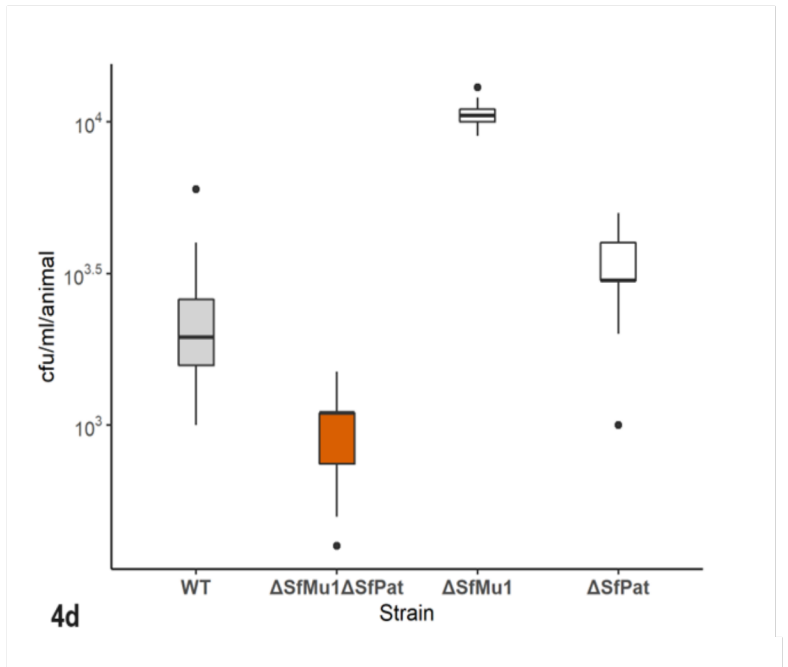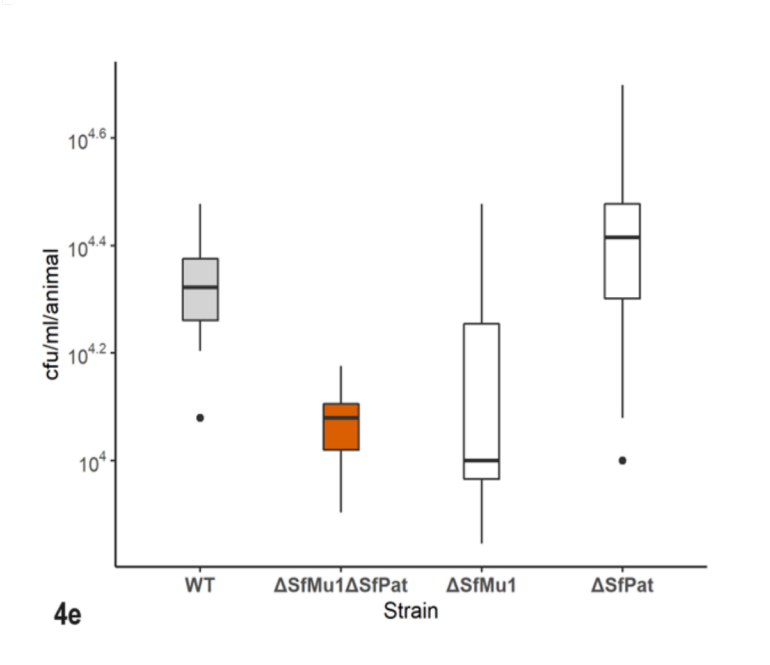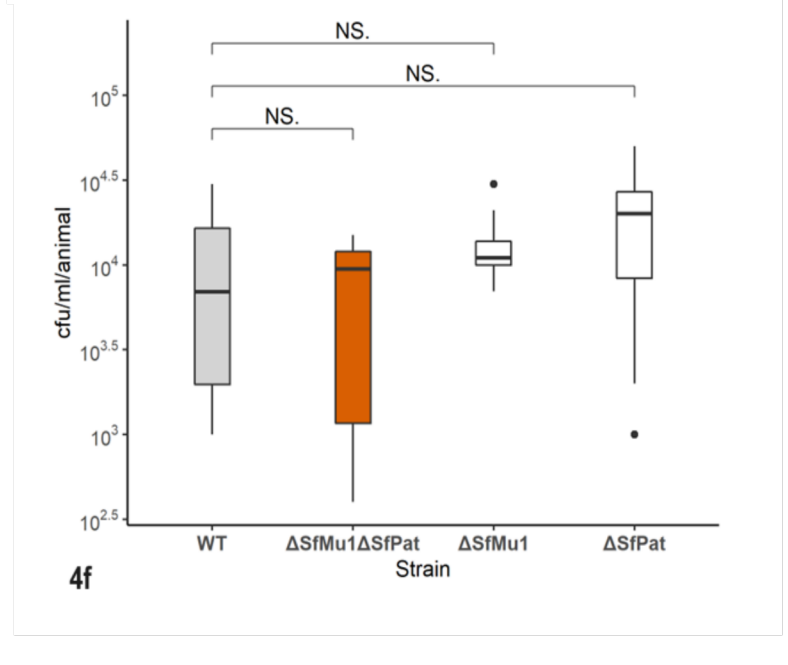

Source: https://www.biorxiv.org/content/biorxiv/early/2024/01/11/2022.11.23.517592.full.pdf
